# Supplementary material
Source: PubMed Central journal article supplement (PMC4681434)

A

SAEC, 24 h.p.i.

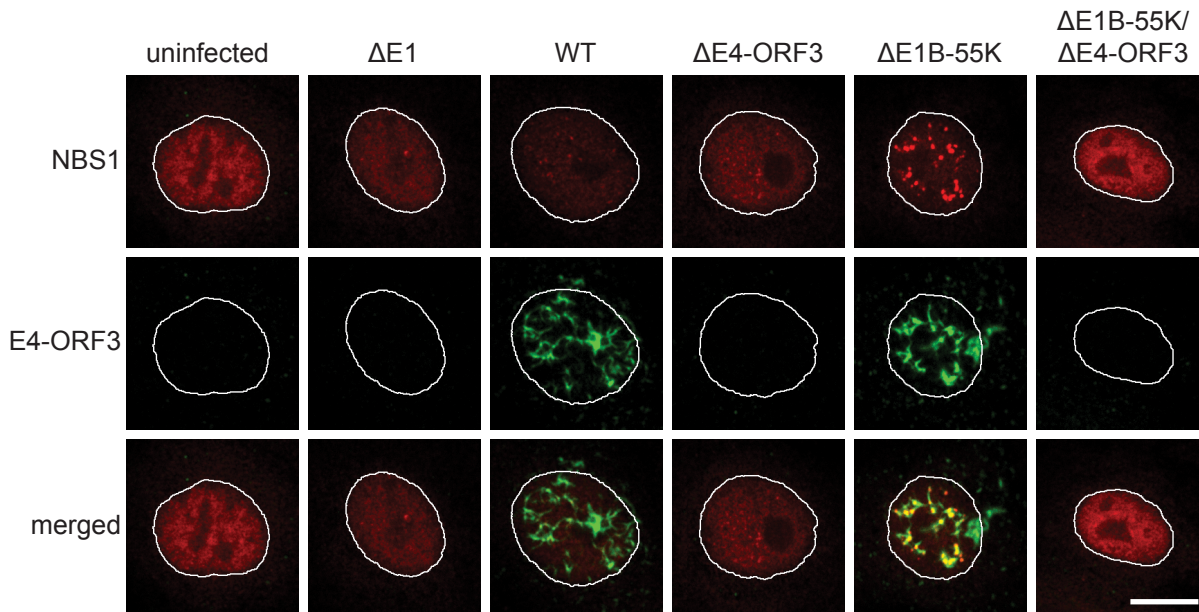

B

SAEC: DDR protein phosphorylation:total ratios

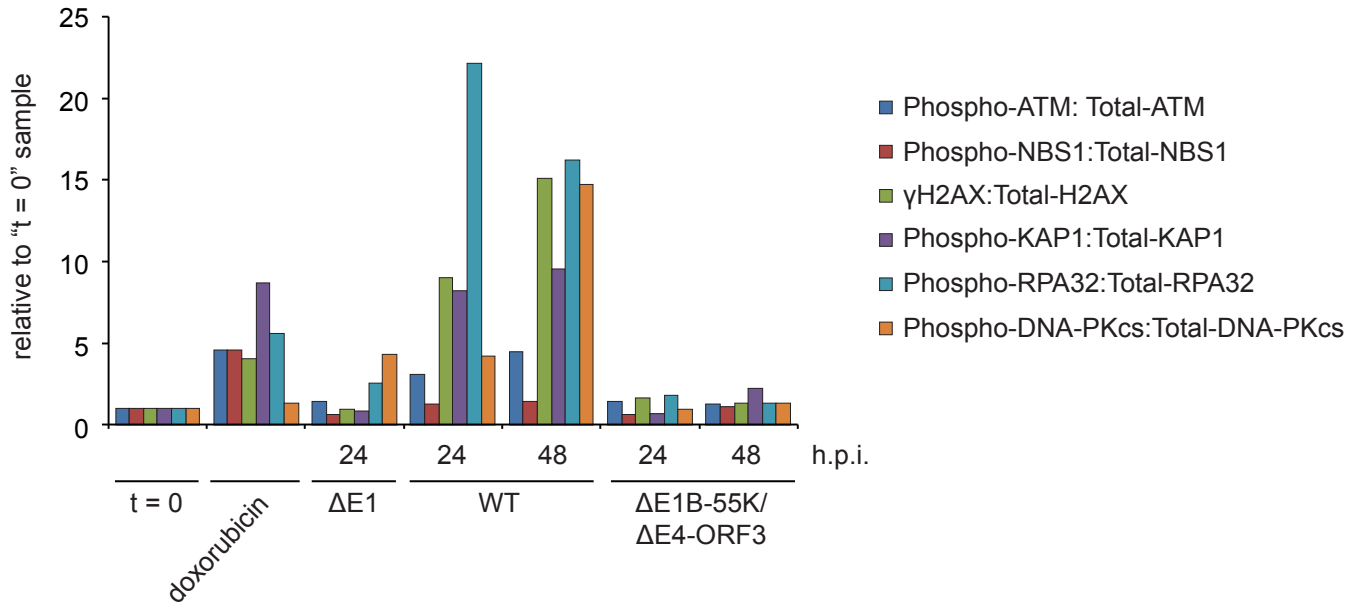

Supplement: NIHMS716666-supplement-1.pdf [file NIHMS716666-supplement-1.pdf]

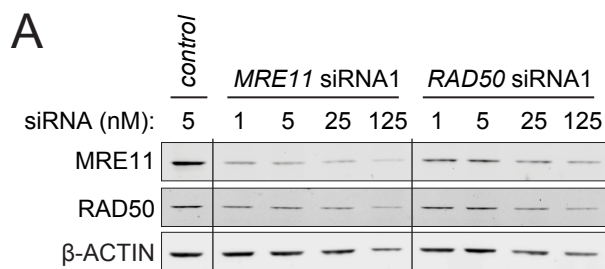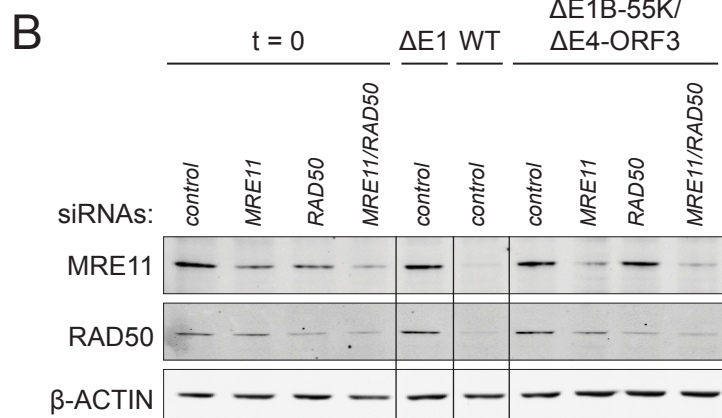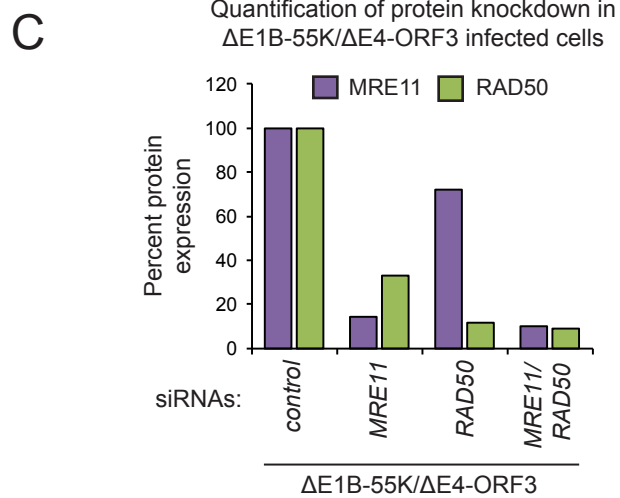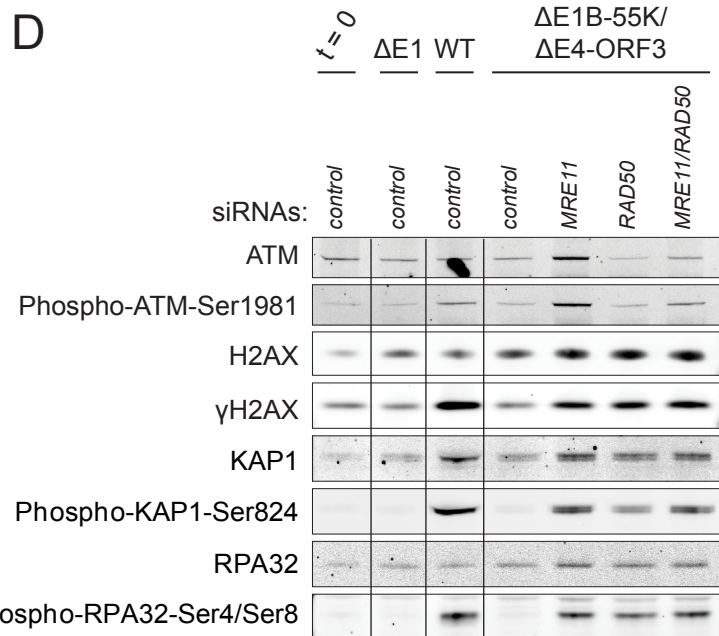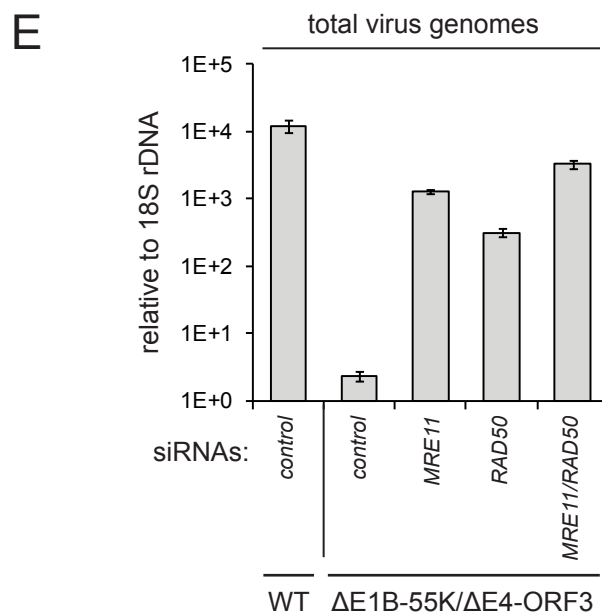

Supplement: NIHMS716666-supplement-2.pdf [file NIHMS716666-supplement-2.pdf]

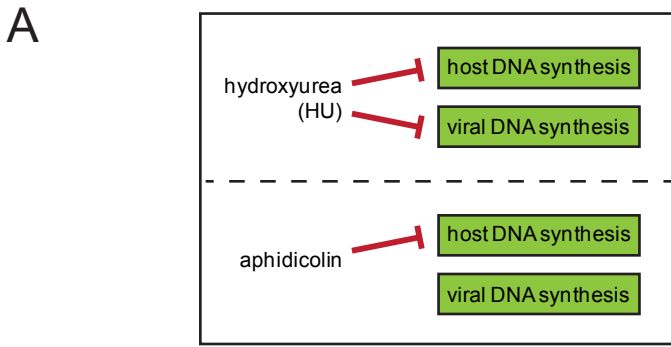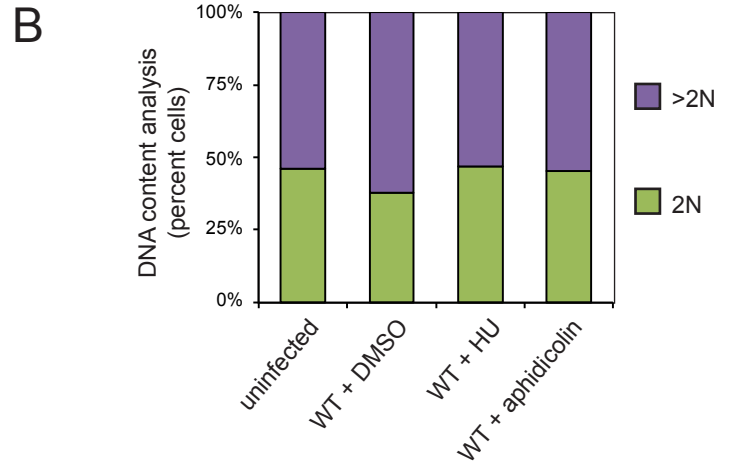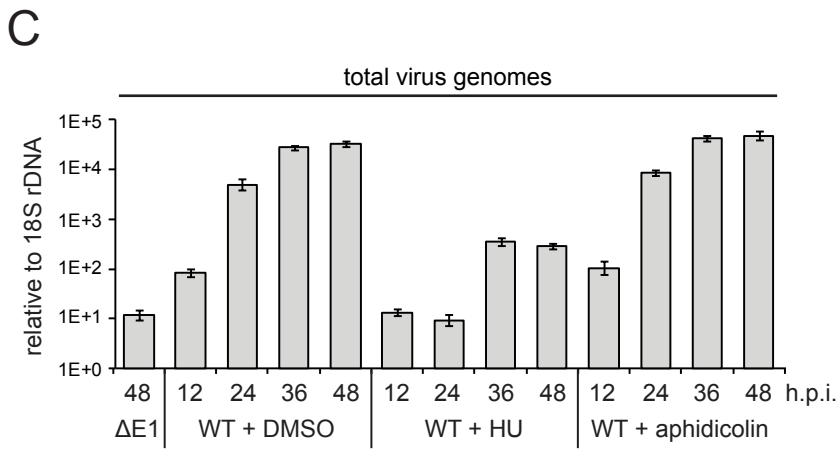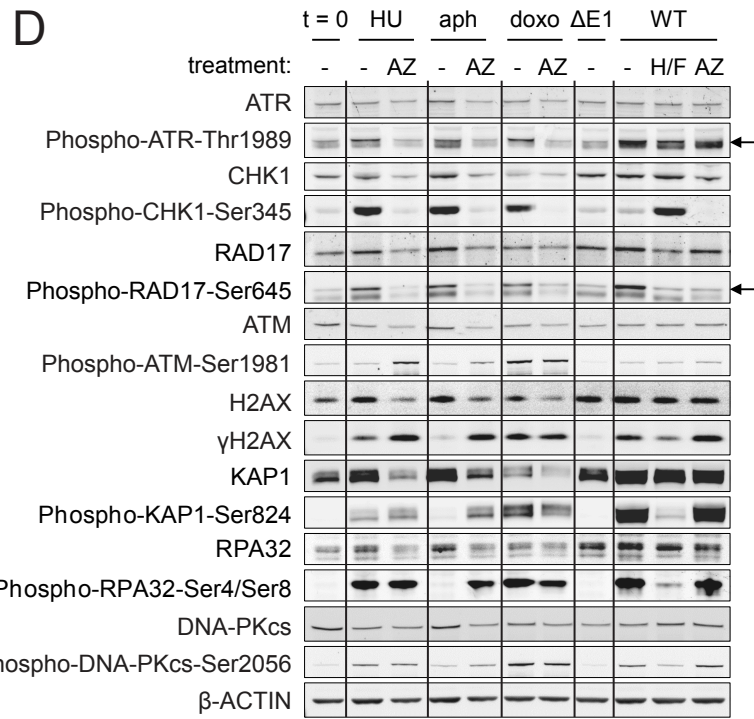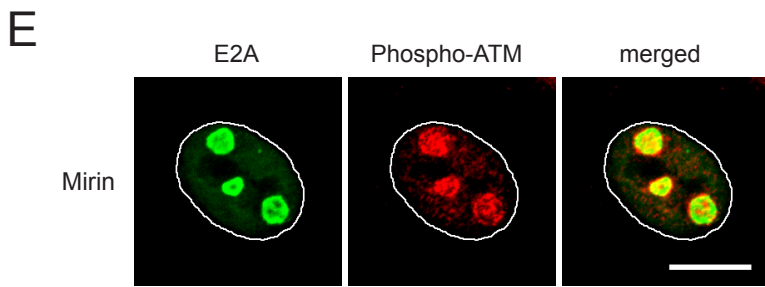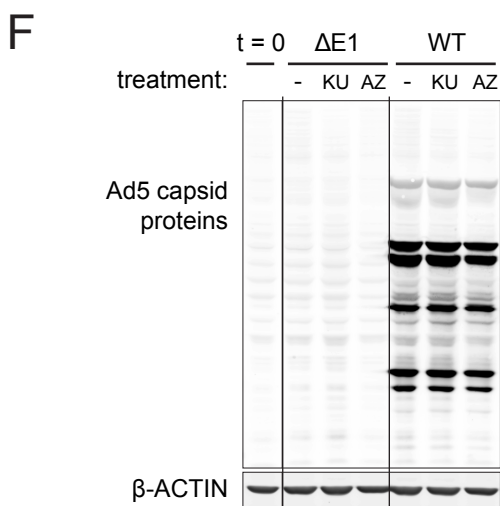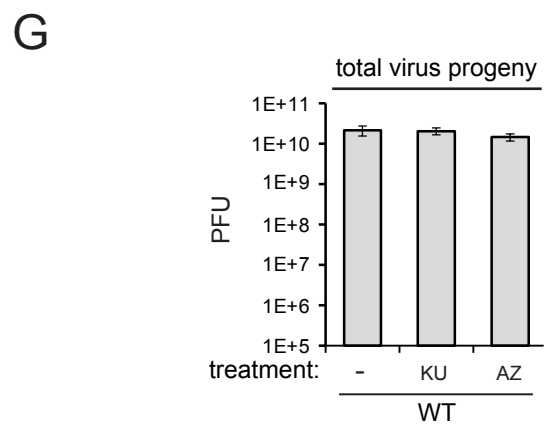

Supplement: NIHMS716666-supplement-3.pdf [file NIHMS716666-supplement-3.pdf]

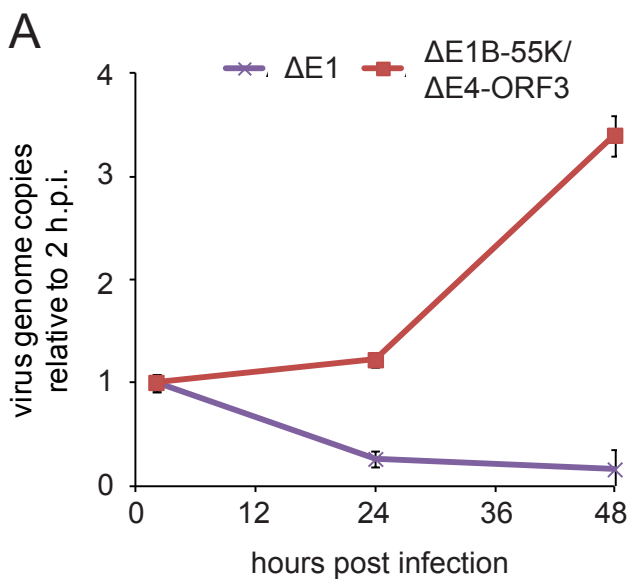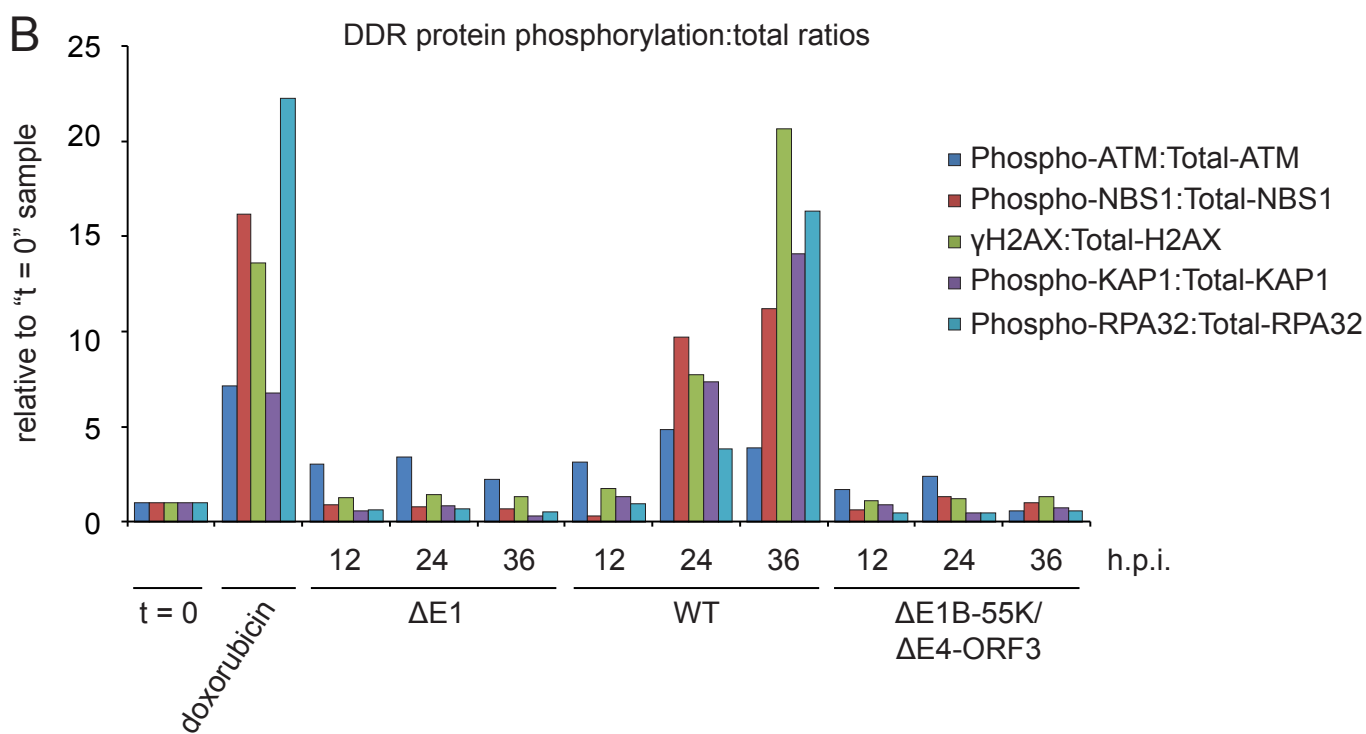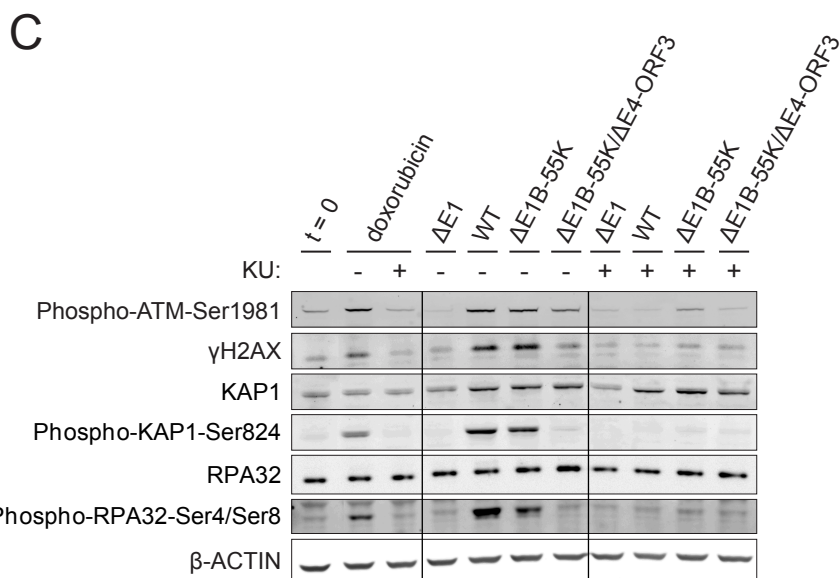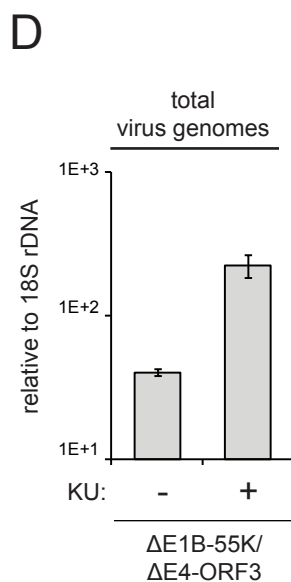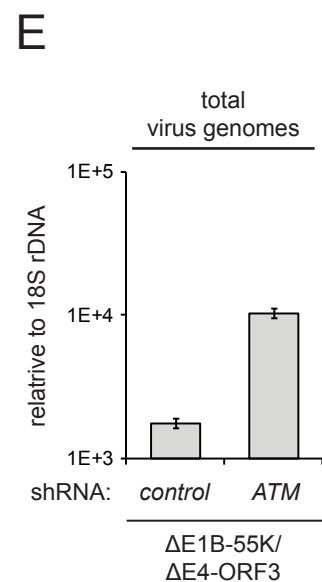

Supplement: NIHMS716666-supplement-4.pdf [file NIHMS716666-supplement-4.pdf]

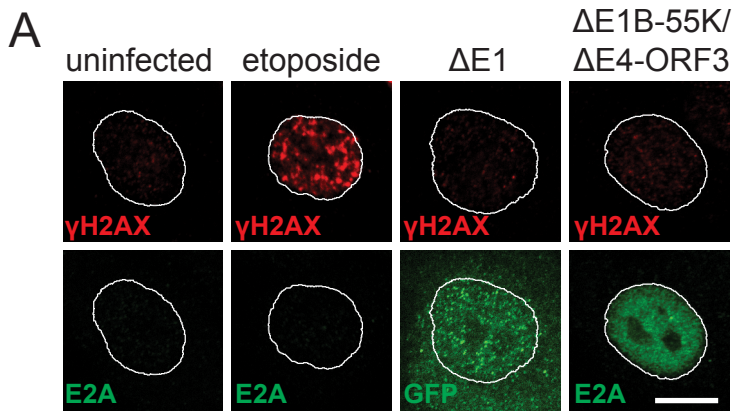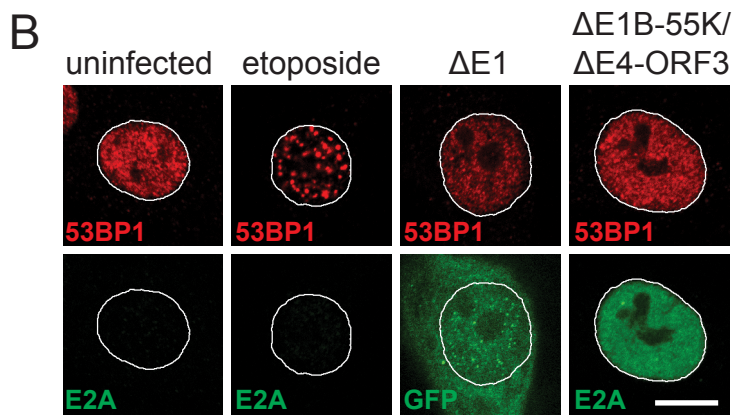

Supplement: NIHMS716666-supplement-5.pdf [file NIHMS716666-supplement-5.pdf]

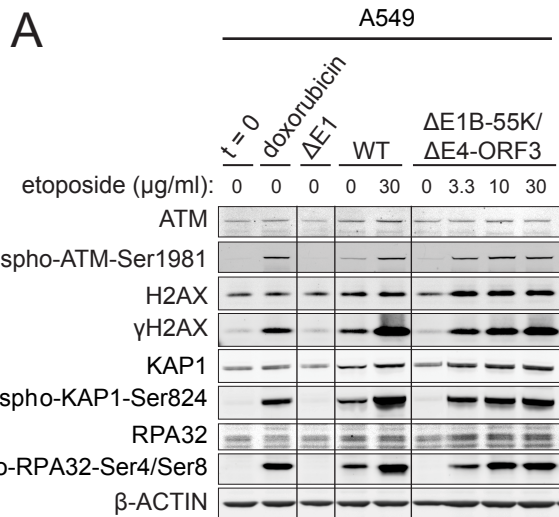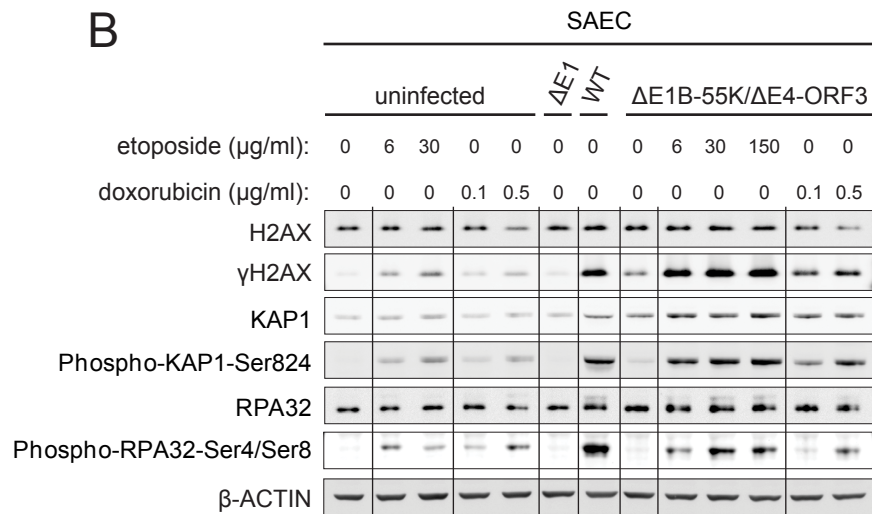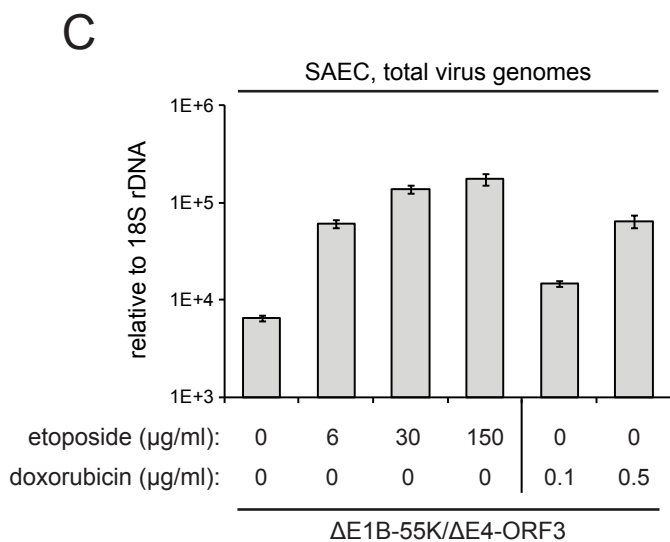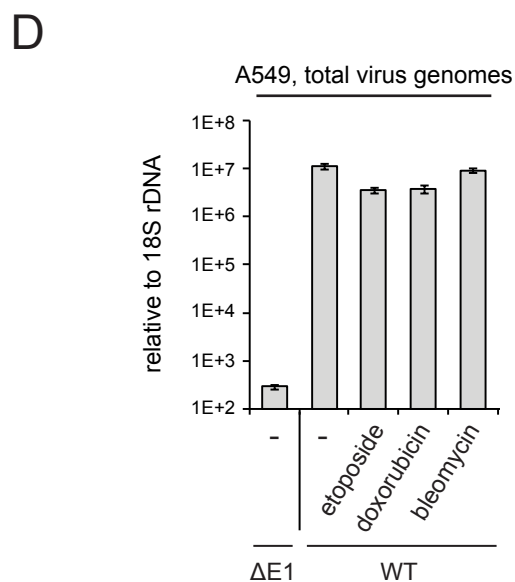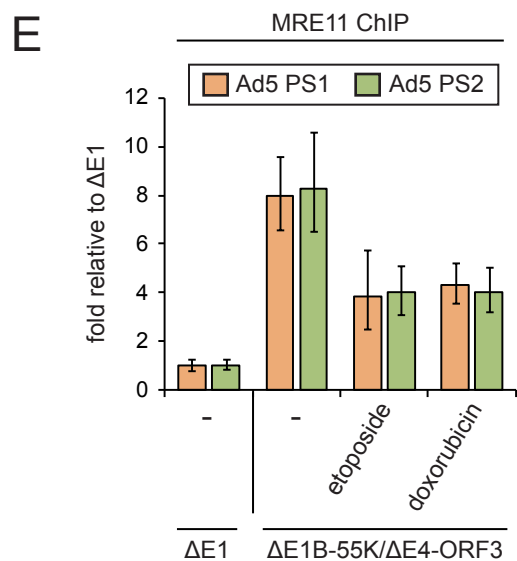

Supplement: NIHMS716666-supplement-6.pdf [file NIHMS716666-supplement-6.pdf]
